# Supplementary material for: Discovery and functional characterization of the oncogenicity and targetability of a novel NOTCH1–ROS1 gene fusion in pediatric angiosarcoma
Source: PubMed Central journal article supplement — Cold Spring Harb Mol Case Stud. 2022 Oct;8(6):a006222. doi: 10.1101/mcs.a006222 (PMC9632357; doi:10.1101/mcs.a006222), 2022-10
Supplement: supp_mcs.a006222_Supplemental_Figures.pdf [file supp_mcs.a006222_Supplemental_Figures.pdf]

### **Supplemental Material:**

**Supplementary Figure 1:** NOTCH1-ROS1 fusion protein expressed in heterologous cell models show membrane localization and protein dimerization, neither of which are essential for oncogenicity. **(a)** Western blot showing stable expression of Myc-tagged vector control, NOTCH1-ROS1 and trunc. NOTCH1-ROS1 in NIH3T3 using anti-Myc tag antibody (top panel) and ROS1 antibody (bottom panel, high exposure of tROS1 panel in figure 3c.). **(b)** Western blot showing protein expression levels in BA/F3 cell model. **(c)** Biochemical membrane-cytosol fractionation to show localization of NOTCH1-ROS1 and Trunc. NOTCH1-ROS1 protein. ◀ represents NOTCH1-ROS1 (256 kDa); ◄ represents Trunc. NOTCH1-ROS1 (118 kDa); ◀◀ represents Cleaved NOTCH1-ROS1 (~75 kDa). **(d, e)** Co-immunoprecipitation assay to show homo-dimerization and hetero-dimerization of NOTCH1-ROS1 fusion and Trunc-NOTCH1-ROS1 proteins in HEK293 cells.

**Supplementary Figure 2:** Gene expression analysis using Nanostring PanCancer Pathways Panel. **(a)** Pathway Scoring analysis that clusters samples in an unbiased hierarchy. **(b)** NOTCH pathway specific gene signature map to show differential clustering of NOTCH1-ROS1 and Trunc. Notch1-ROS1. NIH3T3 cell models analyzed with and without serum, n=1 each.

**Supplementary Figure 3:** Membrane localization of NOTCH1-ROS1 fusion in BA/F3 cells. Western blot analysis of the neutravidin pulldown of proteins expressed at the cell surface (after biotinylation). ◀ represents NOTCH1-ROS1 (256 kDa); ◀◀ represents Cleaved NOTCH1-ROS1 (~75 kDa).

**Supplementary Figure 4:** NOTCH1 inhibitors do not suppress NOTCH1-ROS1 signaling in NIH3T3 cell models. Western blot showing response of signaling pathways in NIH3T3 cells treated with (a) gamma secretase inhibitor, RO4929097 (b) ADAM 10/17 inhibitor, GW280264X , and (c) gamma secretase inhibitor, semagacestat.

**Supplementary Figure 5:** ROS1 inhibitor Entrectinib tested in NOTCH1-ROS1 flank xenograft mouse model. (a) Kaplan Meier survival curves for NSG mice with NOTCH1-ROS1 expressing NIH3T3 and vector control cells and treatment with Entrectinib. (b) Pharmacokinetic (PK) study for Entrectinib.

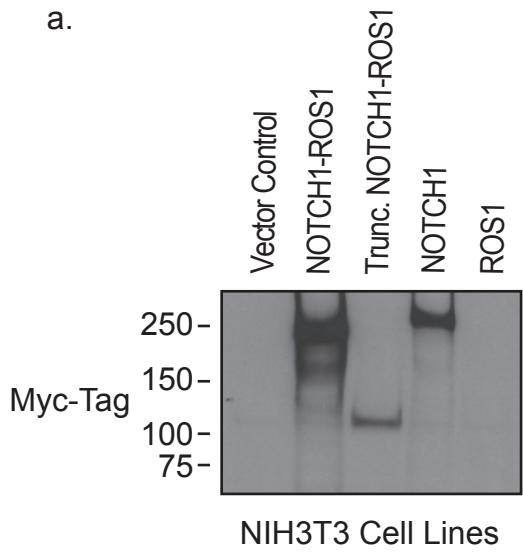

High exposure of figure 3c:

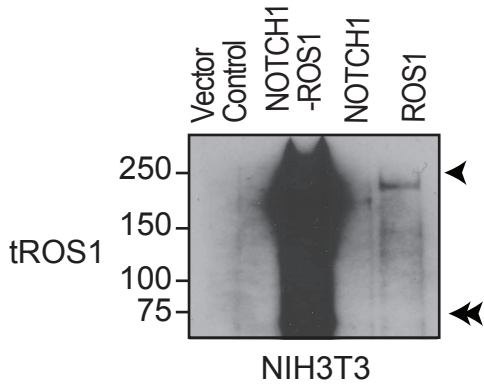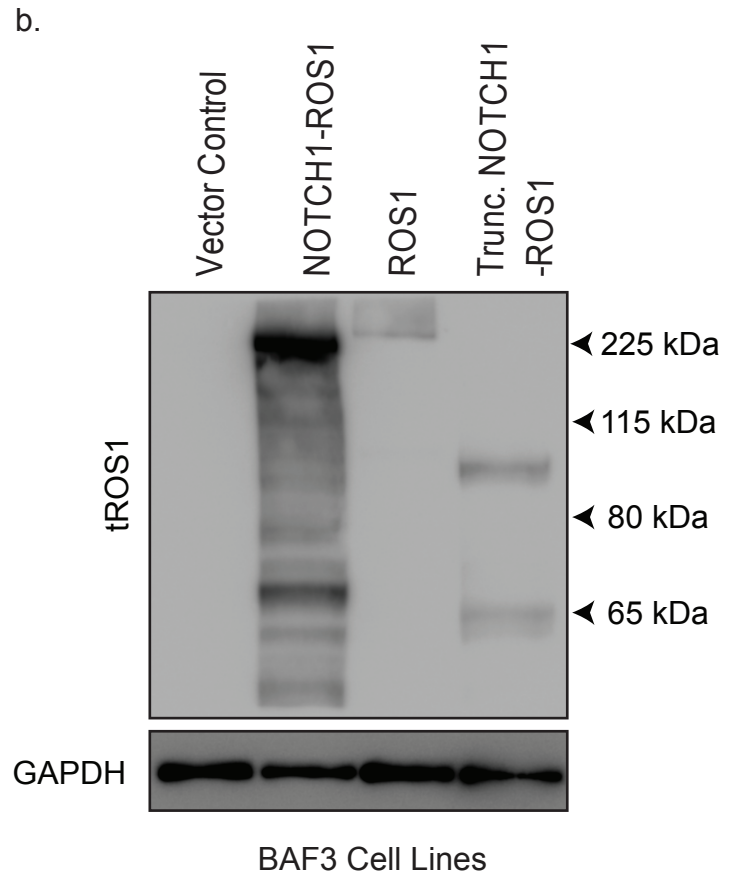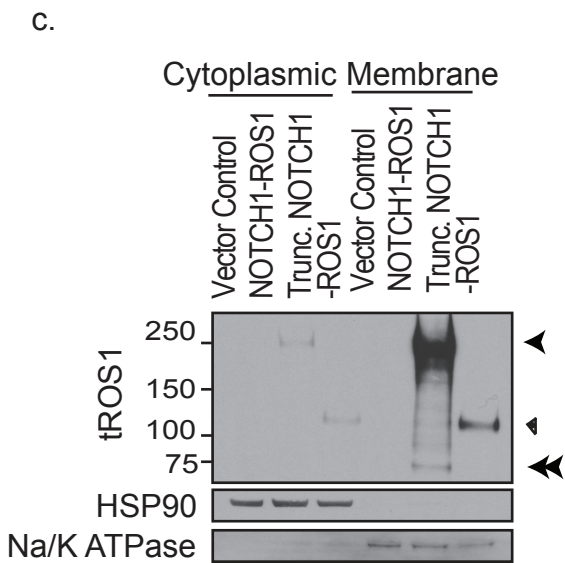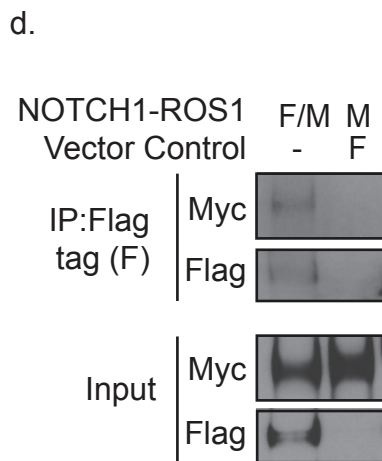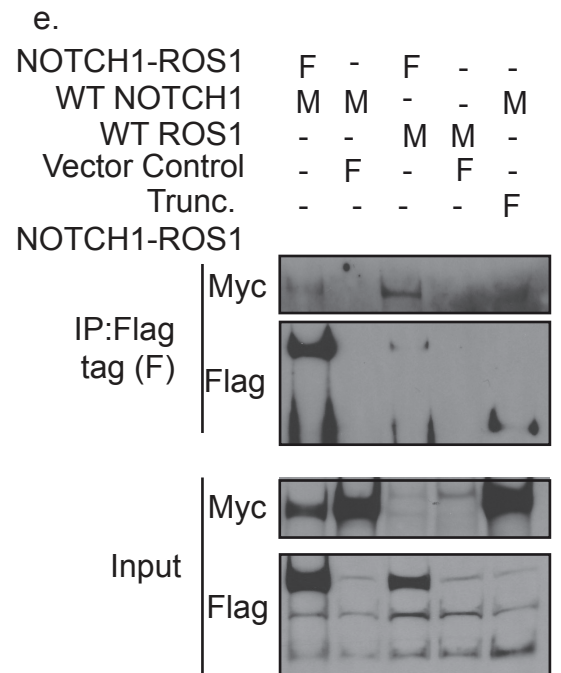

a.

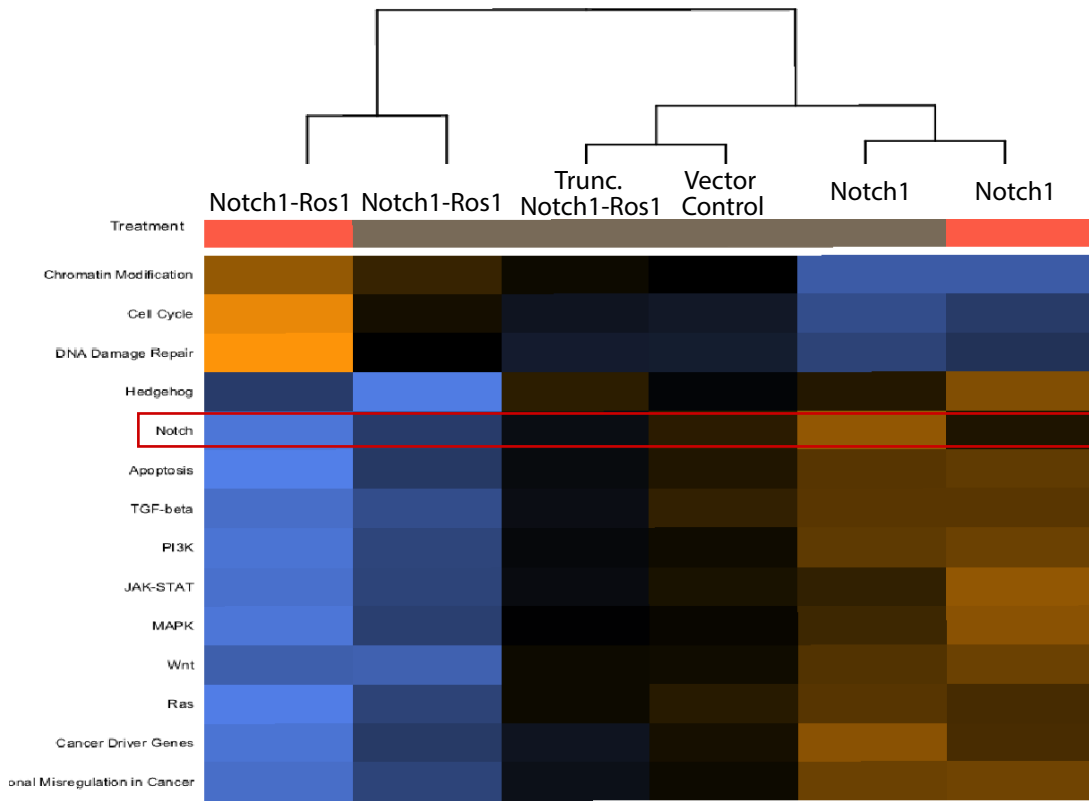

b.

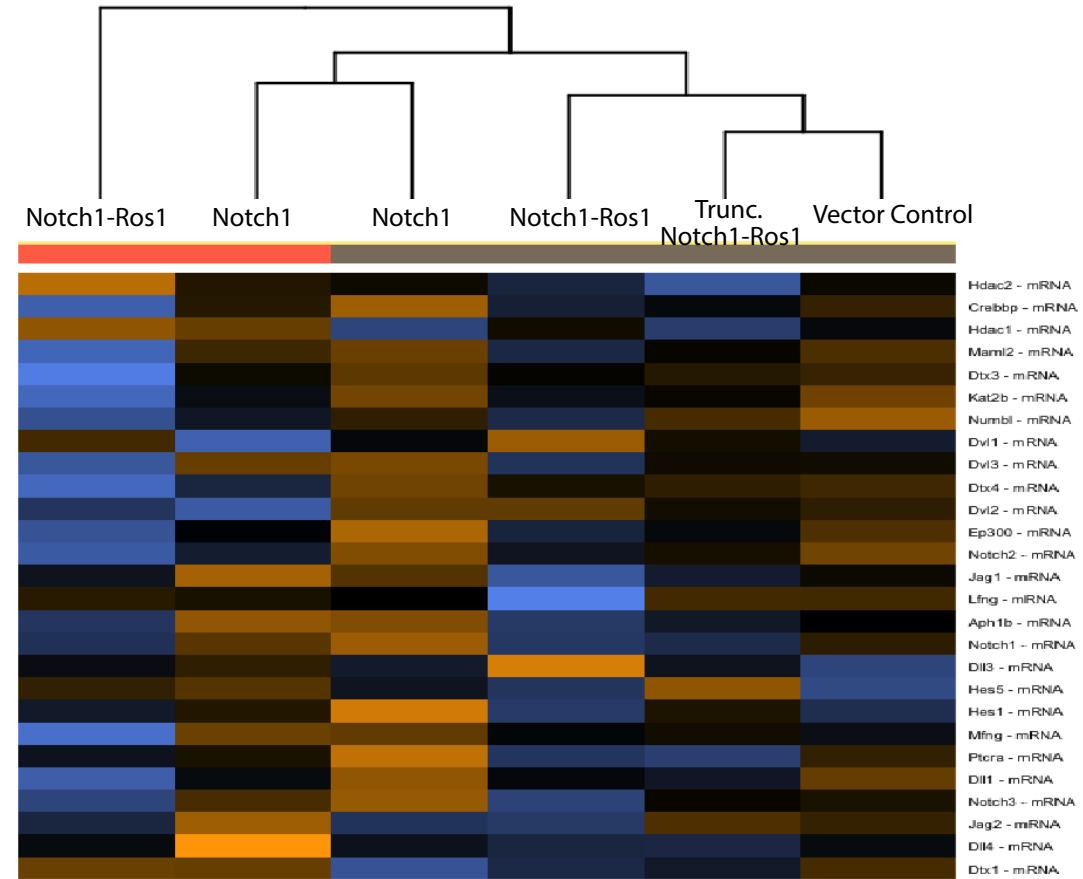

Color keys:

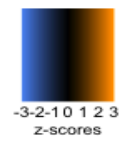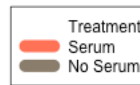

a.

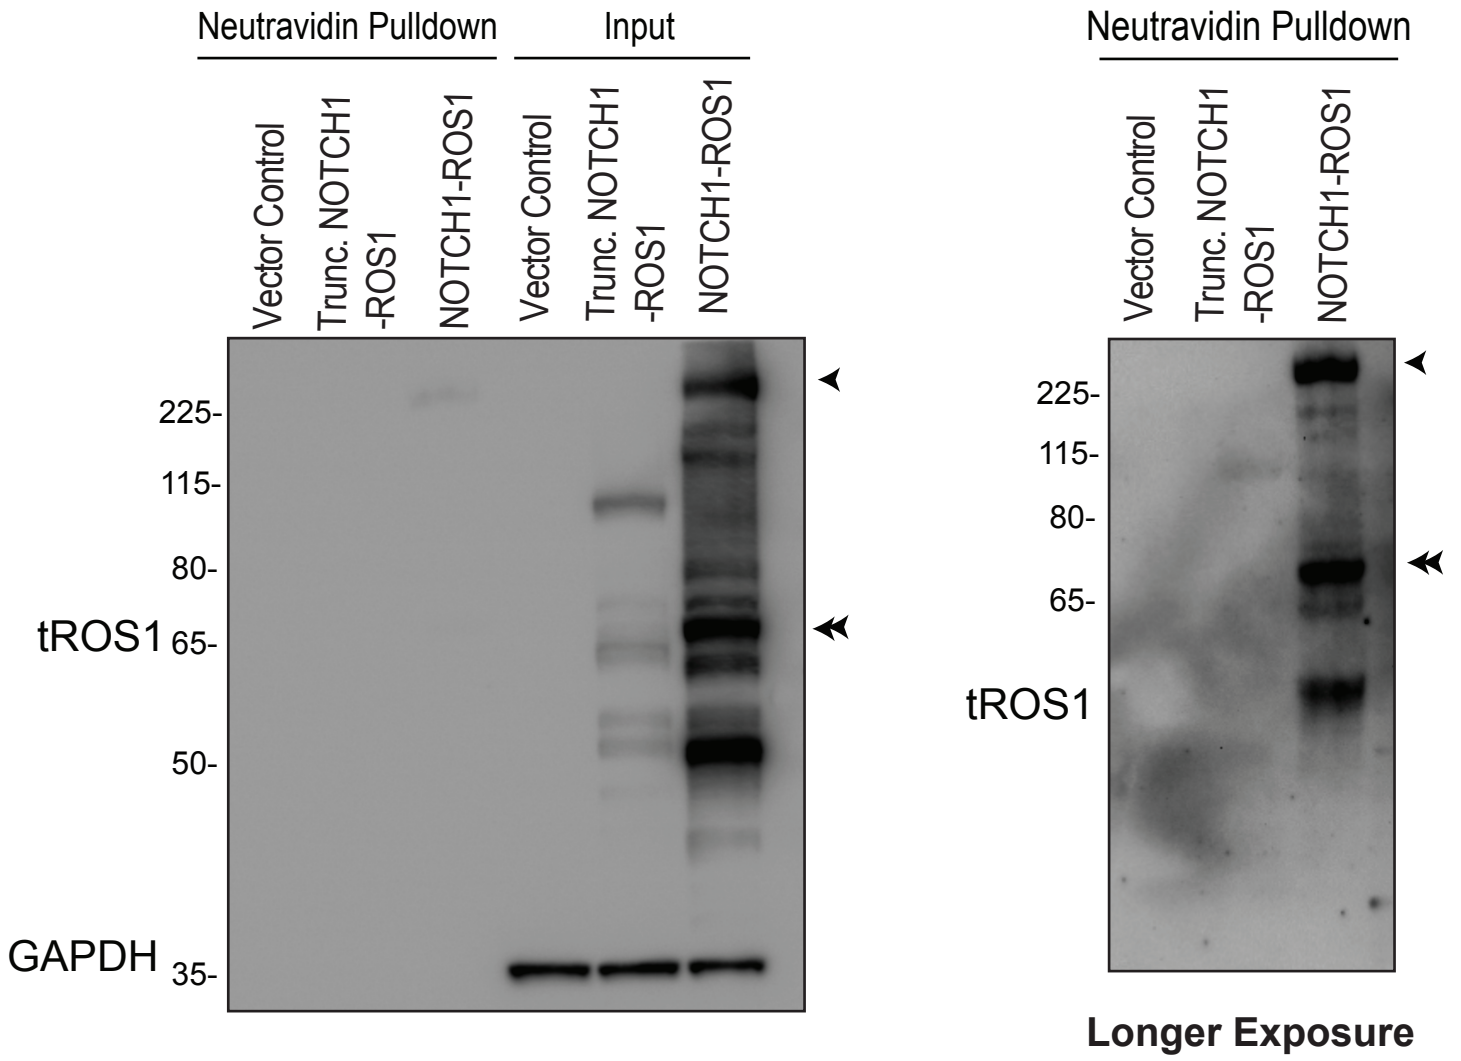

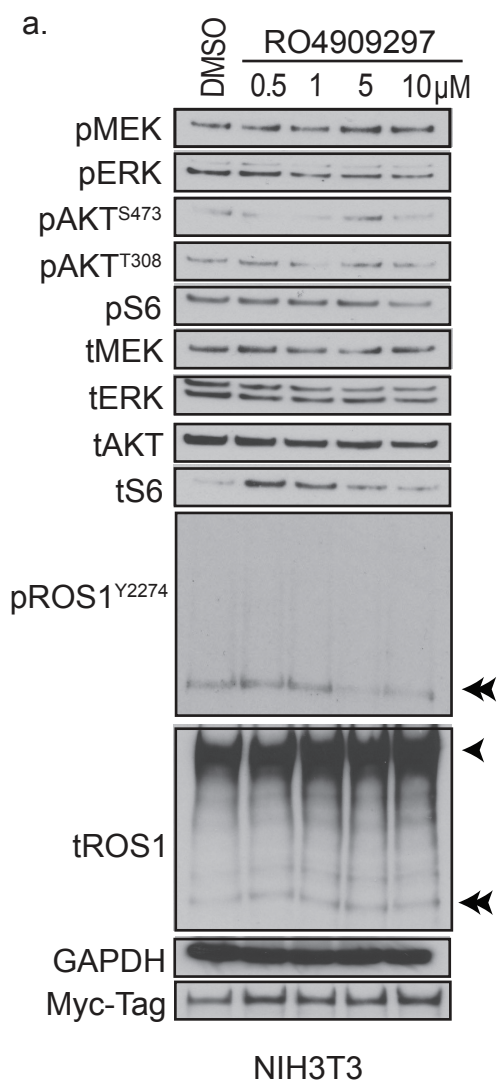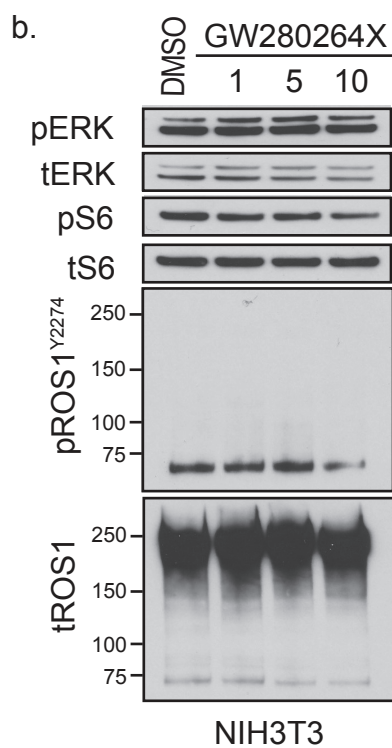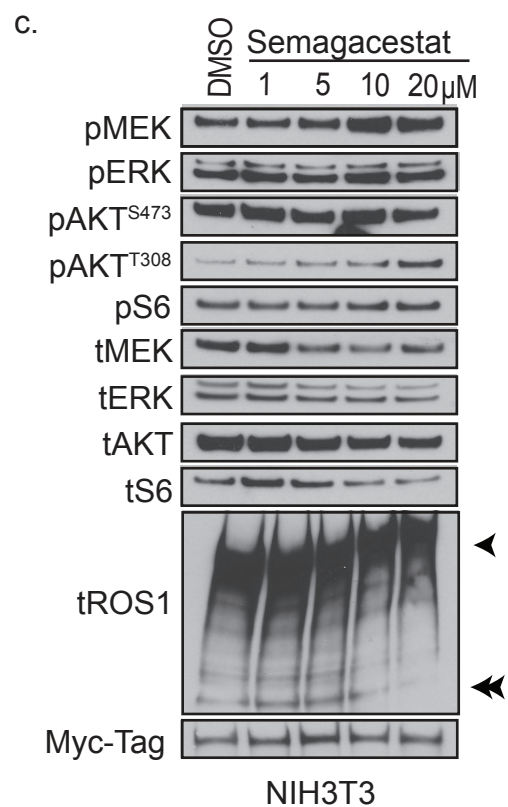

a.

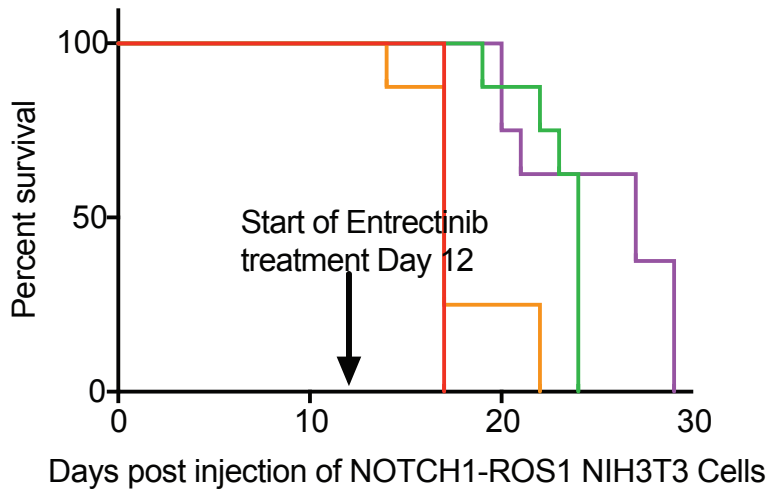

- Vehicle Control
- 15 mg/kg Entrectinib
- 30 mg/kg Entrectinib
- 60 mg/kg Entrectinib

b.

| Treatment Group | Entrectinib Steady State Trough (ng/ml) |
|-----------------|-----------------------------------------|
| 15 mg/kg        | 23.8 (17.3-43.5)                        |
| 30 mg/kg        | 320 (91.7-1290)                         |
| 60 mg/kg        | 805 (576-4080)                          |
